# Supplementary material for: Bioactive microgel-coated electrospun membrane with cell-instructive interfaces and topology for abdominal wall defect repair
Source: Royal Society of Chemistry journal article supplement (doi:10.1039/d4bm00182f), 2024-01-01
Supplement: d4bm00182f1.pdf [file d4bm00182f1.pdf]

## Bioactive microgel coated electrospun membrane with cell-instructive interfaces and topology for abdominal wall defect repair

Renquan Xing,<sup>† ac</sup> Rui Gao,<sup>† b</sup> Yini Huangfu,<sup>ac</sup> Yufeng Zhang,<sup>ac</sup> Shuangyang Li,<sup>ac</sup> Chuangnian Zhang,<sup>\* b</sup> Pingsheng Huang,<sup>b</sup> Weiwei Wang,<sup>b</sup> Anjie Dong,<sup>\* ac</sup> and Zujian Feng<sup>\* b</sup>

### Author affiliations

<sup>a</sup> Department of Polymer Science and Engineering, School of Chemical Engineering and Technology, Tianjin University, Tianjin 300350, China.

<sup>b</sup> Tianjin Key Laboratory of Biomaterial Research, Institute of Biomedical Engineering, Chinese Academy of Medical Sciences and Peking Union Medical College, Tianjin 300192, China.

<sup>c</sup> Frontiers Science Center for Synthetic Biology, Key Laboratory of Systems Bioengineering (MOE), Tianjin University, Tianjin 300350, China.

\* Corresponding authors

Email: cnzhang@mail.nankai.edu.cn, ajdong@tju.edu.cn, fzujian@163.com

<sup>†</sup> These authors contributed equally.

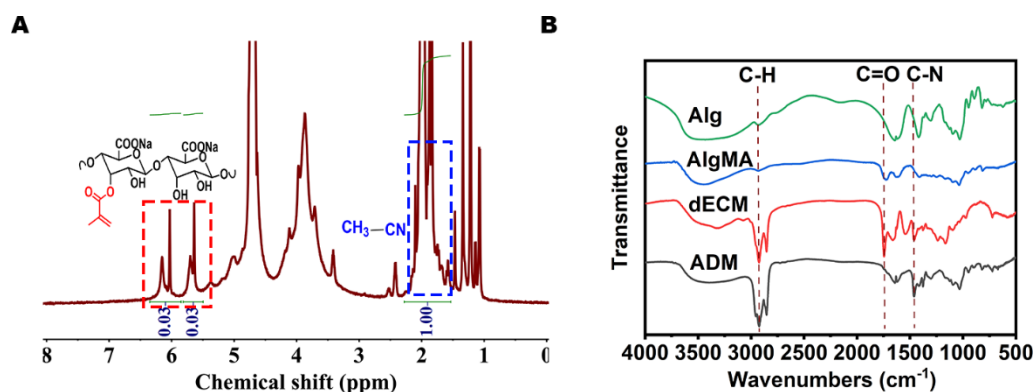

**Fig. S1** (A) <sup>1</sup>H-NMR spectra of AlgMA, and acetonitrile was used as internal standard. (B) FT-IR spectra of Alg, AlgMA, dECM and ADM.

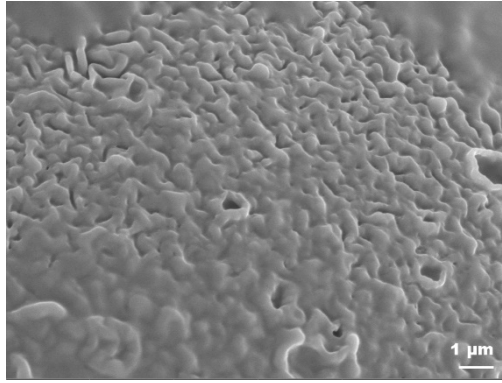

**Fig. S2** SEM image of ADM. Scale bar, 1  $\mu\text{m}$ .

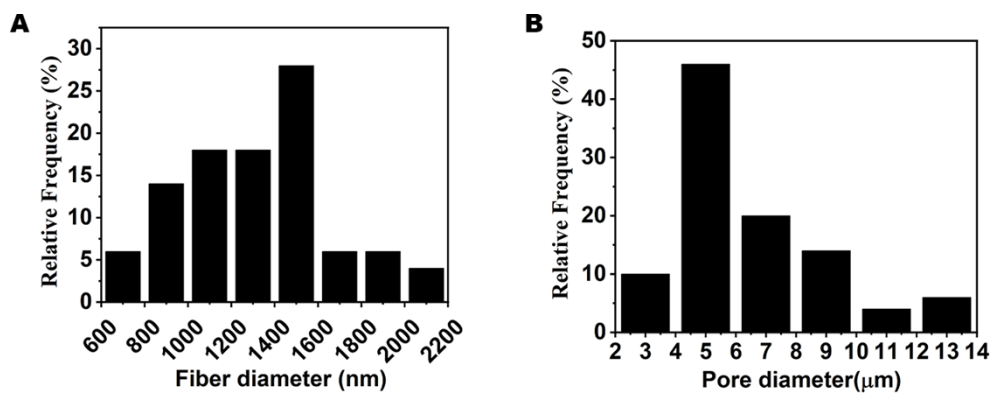

**Fig. S3** Plot of (A) fiber diameter statistics and (B) pore size statistics of PLCL membranes. (n=50)

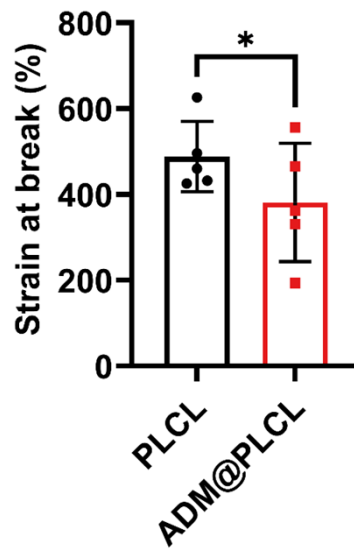

**Fig. S4** Strain at break of PLCL and ADM@PLCL films. Data are expressed as mean  $\pm$  SD (n=5). Significantly different (one-way ANOVA): \* $p < 0.01$ .

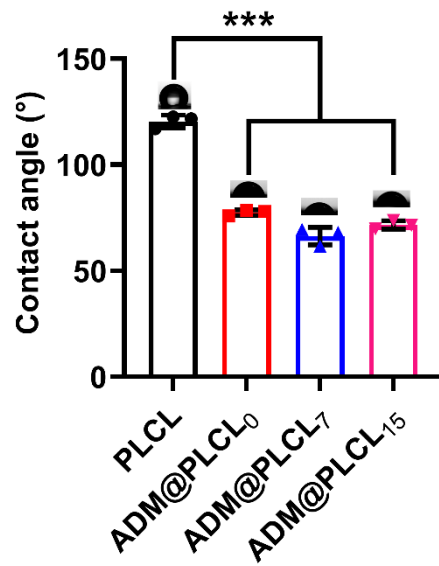

**Fig. S5** Water contact angle of PLCL and ADM@PLCL<sub>x</sub> (subscript x indicates ADM@PLCL immersed in PBS for x days) membranes. Data are expressed as mean ± SD (n=5). Significantly different (one-way ANOVA): \*\*\* $p < 0.001$ .

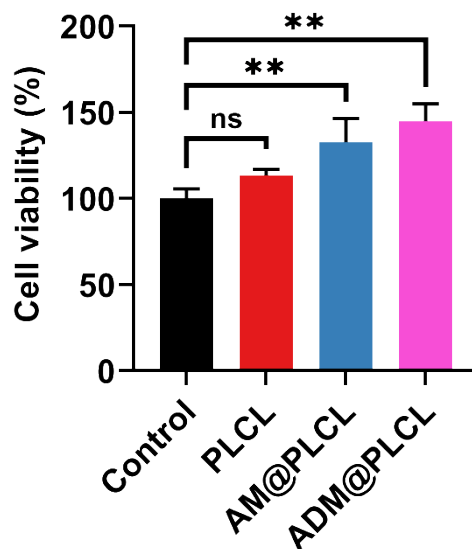

**Fig. S6** CCK-8 analysis of L929 cells after co-culture with extract of different films. Data are expressed as mean ± SD (n=3). Significantly different (one-way ANOVA): no significant difference (ns):  $p > 0.05$  and \*\* $p < 0.01$ .
